# Supplementary material for: Towards harmonization of autoantibody detection in relation to paraneoplastic neurological syndromes (PNS): a European Survey on laboratory practices
Source: publisher site journal article supplement (doi:10.1515/cclm-2025-1030), 2025-10-06
Supplement: Supplementary file 1 [file j_cclm-2025-1030_suppl_002.docx]

**SECTION 1: Introduction**

Dear Colleague,

Paraneoplastic Neurological Syndromes (PNS) represent a diverse group of rare neurological disorders mediated by immune responses that are triggered by an underlying tumor. Today, central in the diagnosis of PNS and the search for the underlying tumor is the identification of specific autoantibodies*.

In this way we invite you to collaborate on a survey about autoantibody detection in relation to PNS. This survey intents to unravel the heterogeneity in this area of autoimmune serology and, hopefully, may contribute to harmonization of the diagnostic approach in PNS. The main topics addressed in the survey focus on the used methodology including the testing algorithm and additional questions to document the strategy of line/dot blot users, test interpretation and clinical context of the requests and quality assurance strategies.

Important:

- Although it is a google form, you do not need to log-in into your google account (if you have any).
- You may receive this request via UK NEQAS and/or IfQ Lübeck based on your participation in their EQC program for these autoantibodies. If your laboratory participates in both programs, please complete the survey only ones because we cannot identify duplicates.
- Depending on your answers, parts of the survey are automatically skipped. Time required to fill in the survey will range between 10 and 25 minutes (complete the survey in one session because you cannot save your responses in between).
- Don’t forget to click on the “send” button at the end of the survey, otherwise your input will be lost.

We sincerely hope that you are willing to invest some time in this topic in order to have sufficient responses for an appropriate conclusion and proposal for harmonization.

Deadline date of the survey is September 30th 2024.

Thanks in advance,

Jan Damoiseaux, Chair EASI

On behalf of the EASI task-force on harmonization of PNS autoimmune serology:

Matthijs Oyaert, Marco Schreurs, David Goncalves, Jan Damoiseaux, and Carolien Bonroy

**For this survey the following high risk PNS autoantibodies are taken into account: anti-amphiphysin, anti-CV2 (CRMP5), anti-PNMA2 (Ma1/Ma2/Ta), anti-Ri (ANNA-2), anti-Yo (PCA-1), anti-Hu (ANNA-1), anti-SOX1 (AGNA), anti-Tr (DNER). These high-risk antibodies are selected based on the updated 2021 diagnostic criteria for PNS (Graus F, Vogrig A, Muñiz-Castrillo S, Antoine JG, Desestret V, Dubey D, et al. Updated Diagnostic Criteria for Paraneoplastic Neurologic Syndromes. Neurol Neuroimmunol Neuroinflamm. 2021 May 18;8(4):e1014.)*

**SECTION 2: GENERAL INFORMATION**

1. Country where your laboratory is located (*manual field*) ***(required)***
2. Is your laboratory (*choice field*) ***(required)***:

- Private lab
- Hospital lab
- University hospital lab
- Other, please specify: (*manual field*)

1. How many requests per month do you receive for the search for auto antibodies in the context of paraneoplastic neurological syndromes (PNS)* (*choice field*) ***(required)***?

- 0
- 1-10
- 11-20
- 21-50
- 51-100
- 101-200
- >200

** These antibodies include: anti-amphiphysin, anti-CV2 (CRMP5), anti-PNMA2 (Ma2/Ta), anti-Ma1, anti-Ri (ANNA-2), anti-Yo (PCA-1), anti-Hu (ANNA-1), anti-SOX1 (AGNA), anti-Tr (DNER).*

1. Are you open for harmonization of the paraneoplastic antibody serology in Europe (with possible adjustments in your laboratory)? (*choice field*) ***(required)***?
   - Yes
   - No

**SECTION 3: PARANEOPLASTIC NEUROLOGICAL SYNDROMES: METHODOLOGY (A)**

1. Which antibodies are tested/reported in case of a request in the context of PNS? (*choice field*) ***(required):***

| **Antibody#** | **Antibody**  **tested** | **Antibody**  **not tested** | **Antibody**  **reported** | **Antibody**  **not reported** |
| --- | --- | --- | --- | --- |
| Anti-amphiphysine |  |  |  |  |
| Anti-CV2 (CRMP5) |  |  |  |  |
| Anti-PNMA2 (Ma2/Ta) |  |  |  |  |
| Anti-Ma1 |  |  |  |  |
| Anti-Ri (ANNA-2) |  |  |  |  |
| Anti-Yo (PCA-1) |  |  |  |  |
| Anti-Hu (ANNA-1) |  |  |  |  |
| Anti-SOX1 (AGNA) |  |  |  |  |
| Anti-Tr (DNER) |  |  |  |  |

1. Do you use indirect immunofluorescence (IIF) on cerebellum to screen for/to detect antibodies associated with PNS? (*choice field*) ***(required):***
2. No
3. Yes *(directed to section 4)*

**SECTION 4: PARANEOPLASTIC NEUROLOGICAL SYNDROMES: METHODOLOGY: IIF ON CEREBELLUM (part 1)**

6. A. Sample type (indicate all that apply) (*choice field, multiple answers possible)* ***(required)***

1. Serum
2. Cerebrospinal fluid (CSF)

6. B. What serum dilution do you use to screen for PNS autoantibodies by IIF? (*choice field)* ***(required)***

1. Undiluted
2. 1 in 10 dilution
3. Other dilution: please specify: (*manual field*)
4. We do not analyze serum

6. C. What CSF dilution do you use to screen for PNS autoantibodies by IIF? (*choice field)* ***(required)***

1. Undiluted
2. 1 in 10 dilution
3. Other dilution: please specify: (*manual field*)
4. We do not analyse CSF

6. D. When the IIF screen is positive, do you perform IIF (end-point) titration? (*choice field)* ***(required)***

- No
- Yes, always
- Yes, only in some cases. Please specify: *(directed to section 5)*

**SECTION 5: End-point titration of IIF**

6.D. 1. In what situations you perform (end-point) titration after positive IIF analysis? *(manual field)* ***(required)***

**SECTION 6: PNS: methodology: IIF on cerebellum (part 2)**

6. E. Do you combine IIF on cerebellum with other substrates? (more answers possible, indicate all methods that you perform) *(choice field)* ***(required)***

1. Intestine
2. HEp-2
3. Nerve
4. Other (please specify) : (*manual field*)

6. F. Which vendor/supplier are you using for IIF? (more answers possible, indicate all methods that you perform) (*choice field*) ***(required)***

1. Euroimmun
2. Inova Diagnostics
3. An in-house developed assay is used
4. Other (please specify): (*manual field*)

6. G. which conjugate do you use for IIF? (*choice field*) ***(required)***

1. IgG conjugate
2. IgG, IgA and IgM conjugate
3. Other (please specify): (*manual field*)

6. H. Do you use an automated microscope to digitize the images? *(choice field*) ***(required)***

1. Yes (*directed to section 7*)
2. No (*directed to section 8*)

**SECTION 7: Automated microscope**

6.H.1. What is the vendor of the automated microscope that you use to digitize your images? (*manual field*) ***(required)***

**SECTION 8: PNS: METHODOLOGY (B)**

1. Do you have a testing-algorithm for the detection of PNS autoantibodies? (multiple answers are possible)? (*choice field*) ***(required)***
2. No (*directed to section 10*)
3. Yes (*directed to section 9*)

**SECTION 9: PNS: methodology: algorithm**

7.A.1. Which factors influence the testing-algorithm for the detection of PNS autoantibodies? (indicate all that apply)? (multiple answers are possible)? (*choice field*) ***(required)***

1. We always use the same testing algorithm
2. The testing algorithm may vary depending on the type of samples (serum/plasma and/or CSF) available
3. The testing algorithm may vary depending on the lab tests requested (e.g. combined request with extracellular autoantibodies)
4. Other, please specify: (*manual field*)

7.A.2. If other factors than those listed above influence the testing algorithm, please specify: (*manual field*)

7.A.3 Which algorithm are you (mostly) using for the detection of PNS autoantibodies **on serum**? (*choice field*) ***(required)***

1. Screen with IIF on cerebellum followed by identification of the specific PNS antibody with an antigen specific method (e.g. Line immuno assay) in case of positivity on IIF
2. We perform IIF on cerebellum and identification of the specific PNS antibody by an antigen specific method always in parallel
3. We only perform antigen specific method(s), but no IIF analysis
4. Other, please specify: (*manual field*)

7.A.4. What algorithm are you (mostly) using for the detection of PNS autoantibodies on CSF? ***(required)***

1. Screen with IIF on cerebellum followed by identification of the specific PNS antibody with an antigen specific method (e.g. Line immuno assay) in case of positivity on IIF
2. We perform IIF on cerebellum and identification of the specific PNS antibody by an antigen specific method always in parallel
3. We only perform antigen specific method(s), but no IIF analysis
4. Other, please specify: (*manual field*)

7.B. Please describe below the algorithm applied in your lab for the following antibodies by indicating the correct position of each test per antibody in the table below using the following instructions: ***(required)***

- If the test is positioned as first line test and performed on every PNS request > indicate ‘1’
- If the test is positioned as a second line test, implying that is only applied depending on the result of the first line test > indicate ‘2’
- If the test is positioned as a third line test, implying that is only applied in case additional confirmation beyond the result of the first and second line test is needed (e.g. in case discrepant or inconclusive result) > indicate ‘3 ’
- If two tests are performed in parallel on all samples, identical levels (first line, second line, etc. ) should be assigned to these tests.
- If the test is not performed for the particular antibody > indicate ‘0 ’

| **Antibody** | **TEST** | | | |
| --- | --- | --- | --- | --- |
| **Cerebellum** | **Blot Euroimmun** | **Blot Ravo** | **Analysis in a referral lab** |
| Anti-amphiphysin |  |  |  |  |
| Anti-CV2 (CRMP5) |  |  |  |  |
| Anti-PNMA2 (Ma2/Ta) |  |  |  |  |
| Anti-Ma1 |  |  |  |  |
| Anti-Ri (ANNA-2) |  |  |  |  |
| Anti-Yo (PCA-2) |  |  |  |  |
| Anti-Hu (ANNA-1) |  |  |  |  |
| Anti-SOX1 (AGNA) |  |  |  |  |
| Anti-Tr (DNER) |  |  |  |  |

**SECTION 10: PNS: methodology: other methods (part 1)**

1. Do you use **other methods than line/dot blot** for the **identification** of PNS autoantibodies? ***(required)***
2. No (directed to section 12)
3. Yes (directed to section 11)

**SECTION 11: Alternative methods  for the identification of PNS autoantibodies :**

8.A. Specify the other methods (other methods than line or dot blot) used for the identification of PNS autoantibodies: (manual field) ***(required)***

8.B. For which antibodies do you use an alternative method (other methods than line or dot blot)? (*choice field, multiple answers possible*) ***(required)***

1. anti-amphiphysin
2. anti-CV2 (CRMP5)
3. anti-PNMA2 (Ma2/Ta)
4. anti-Ma1
5. anti-Ri (ANNA-2)
6. anti-Yo (PCA-1)
7. anti-Hu (ANNA-1)
8. anti-SOX1 (AGNA)
9. anti-Tr (DNER)

**SECTION 12: PNS: METHODOLOGY: Combined methods**

1. If you use more than 1 antigen-specific method **for the same antibody**, what are your reasons? If you use two different dot/line blots for detecting the same antibody, this should be taken into account: (*choice field, multiple answers possible*) ***(required)***
   1. We do not perform more than 1 method per antigen for the detection of paraneoplastic antibodies
   2. Because of different performance characteristics (sensitivity, specificity) of the different methods
   3. If we observe a discrepancy between the IIF pattern and the antigen identified, we confirm the result with an antigen specific method 2
   4. We always perform two antigen specific assays because of different performance characteristics

**SECTION 13: PNS: line/dot blot**

1. Do you use line blot or dot blot for the identification of PNS autoantibodies (choice field)? ***(required)***
   1. Yes (*directed to section 14*)
   2. No (*directed to section 16*)

**SECTION 14: details for line/dot blot users**

1. Which blot do you use to identify a specific paraneoplastic auto antibody? (more answers possible, indicate all methods that you perform) (*choice field*) ***(required)***
2. Ravo PNS 7 blot (PNS autoantibodies anti-Hu, anti-Yo, anti-Ri, anti-CV2/CRMP5, anti-amphiphysin, anti-Ma1 and anti-Ma2)
3. Ravo PNS 9 blot (PNS autoantibodies anti-GAD65, anti-Hu, anti-Yo, anti-Ri, anti-CV2/CRMP5, anti-amphiphysin, anti-Ma1, anti-Ma2 and anti-SOX1)
4. Ravo PNS 11 lines blot (PNS autoantibodies anti-Hu, anti-Yo, anti-Ri, anti-CV2/CRMP5, anti-amphiphysin, anti-Ma1, anti-Ma2, anti-SOX1, anti-GAD65, anti-Tr (DNR) and anti-ZIC4)
5. Ravo PNS 14 lines blot (PNS autoantibodies anti-Hu, anti-Yo, anti-Ri, anti-CV2/CRMP5, anti-amphiphysin, anti-Ma1, anti-Ma2, anti-SOX1, anti-GAD65, anti-Tr (DNR), anti-ZIC4, anti-titin (MGT30), anti-recoverin and anti-Protein kinase Cγ)
6. Euroimmun blot (ref: DL 1111-2G) (PNS autoantibodies: anti-amphiphysin, anti-CV2, anti-Ma2/Ta, anti-Ri, anti-Yo and anti-Hu)
7. Euroimmun blot (ref: DL 1111-4G) (PNS autoantibodies: anti-amphiphysin, anti-CV2, anti-Ma2/Ta, anti-Ri, anti-Yo, anti-Hu, anti-recoverin, anti-SOX1, anti-titin)
8. Euroimmun blot (ref: DL 1111-6G) (PNS autoantibodies: anti-SOX1 and anti-titin)
9. Euroimmun blot (ref: DL 1111-7G) (PNS autoantibodies: anti-amphiphysin, anti-CV2, anti-Ma2/Ta, anti-Ri, anti-Yo, anti-Hu, anti-recoverine, anti-SOX1, anti-titin, anti-ZIC4, anti-GAD65 and anti-Tr (DNER))
10. Other: please specify (*manual field)*:
11. Do you use a digital reader system for the analysis of the results? (*choice field)* ***(required)***
12. No, line blots and/or dot blots are read visually (*directed to section 16*)
13. Yes: we use digitized reading for at least one of the blot-systems that we use (*directed to section 15*)

**SECTION 15: Digital reader system**

12.b. Please indicate in the table for which supplier you are using for digitized reading? (*choice field*) ***(required)***

|  | **Visual reading** | **Digitized reading** | **Method not used** |
| --- | --- | --- | --- |
| **Euroimmun blot** |  |  |  |
| **Ravo blot** |  |  |  |
| **Other blot 1** |  |  |  |
| **Other blot 2** |  |  |  |

1. How do you report the results of the line and/or dot blots? (*choice field*) ***(required)***
2. Qualitative (negative or positive) categorized based on the manufacturers cut-off
3. Qualitative (negative or positive) based on an in-house established cut-off
4. Semi-quantitative (scores e.g. negative, +/-, +, ++, …) categorized using manufacturers cut-off values
5. Semi-quantitative (scores e.g. negative, +/-, +, ++, …) categorized using in-house established cut-off values
6. Quantitative values as generated by the automated system/scanner are reported
7. Otherwise, (please specify) (*manual field*)

**SECTION 16 : PNS: test interpretation and clinical context**

1. Do you add a comment with clinical interpretation (*choice field*) ***(required)***:
2. No
3. For positive results only
4. For negative results only
5. For all results
6. For other, please specify: (*manual field*)
7. Can all clinical disciplines request a screening for PNS autoantibodies? (*choice field*) ***(required):***
8. Yes, all clinical disciplines, including general practitioners (*directed to section 18*)
9. Yes, all clinical disciplines, except general practitioners (*directed to section 18*)
10. No, only a selected set of clinical disciplines (*directed to section 17*)

**SECTION 17: Disciplines**

15.B. What clinical disciplines can request a screening for PNS autoantibodies? (multiple answers possible) (*choice field*) ***(required)***

1. Neurology department
2. Rheumatology department
3. Emergency department
4. Intensive care department
5. Other , please specify (*manual field*)

**SECTION 18 : PNS : test interpretation and clinical context (part 2)**

1. Does the lab have **information on the clinical context** in which the analyses are requested? (multiple answers possible) (*choice field*) ***(required)***
2. Yes, access to the electronic patient information system
3. Yes, contact with the requestors
4. No
5. Other, please specify (*manual field*)
6. Do you feel that your clinicians request these tests in a context of a high **pre-test probability**? (*choice field*) ***(required)***
   1. Yes
   2. No
7. How many of the requests for PNS autoantibodies (expressed as percentage of total requests) are positive in antigen specific assays? (*manual field*) ***(required)***:
8. Do you consider follow-up testing of the PNS autoantibodies useful for clinical/treatment decision making (manual field) ***(required)***?
   1. No (*directed to section 20*)
   2. Yes, for all antibodies (*directed to section 20)*
   3. Yes, for specific antibodies (*directed to section 19*)

**SECTION 19 : Follow-up testing of the PNS autoantibodies**

19.b. For what antibodies do you consider follow-up testing of the PNS autoantibodies useful for clinical/treatment decision making ? (*manual field*) ***(required)***

**SECTION 20: PNS: test interpretation and clinical context (part 3)**

20.C. If you perform at least one confirmation assay, how do you manage the discordant results? (*choice field*) ***(required)***

1. I report all the individual results of the different tests and let the clinician conclude (no conclusion added)
2. I report all the individual results of the different tests and add a conclusion (e.g. related to clinical point of view and assay-dependent variability, antigen presentation)
3. I integrate the individual results and report one combined result conclusion/interpretation (the individual results of the different test are not reported)
4. I do not perform confirmation assays
5. Other, please specify (*manual field*)
6. Do you discuss the PNS antibody results with the clinicians, either by phone or in multidisciplinary meetings? (choice field) ***(required)***
7. No, never (*directed to section 22)*
8. No, only upon request (*directed to section 22)*
9. Yes, always (positive and negative results) (*directed to section 22)*
10. Yes, only a selection of the results is discussed (*directed to section 21)*

**SECTION 21 : Details on the result discussion**

20.B. What **type of  PNS antibody results  are discussed**  with the clinicians, either by phone or in multidisciplinary meetings? (multiple answers possible) (*choice field*) ***(required)***

1. Results with positivity for one of the antibodies
2. Negative results in combination with (high) clinical suspicion
3. Results that are discrepant between the different test methods
4. other, please specify (*manual field*)

**SECTION 22: PNS: Quality assurance strategies**

20.A. Do you apply indirect immunofluorescence (IIF) on cerebellum for antibodies associated with PNS? ***(required)***

- 1. No (*directed to section 26*)
  2. Yes (*directed to section 23)*

**SECTION 23: PNS: Quality assurance strategies: cerebellum**

21. Do you perform an internal QC for cerebellum IIF? **A run iQC implies that a sample with a known specificity is analysed together with patient samples. This differs from internal cut-off QC, which is often also present on line or dot-blot.* ***(required)***

1. Yes (*directed to section 25)*
2. No (*directed to section 24*)

**SECTION 24: Details on run iQC for cerebellum**

21.A. Which type of IQC material is being used? (*choice field*) ***(required)***

1. Kit included commercial IQC
2. An alternative commercial IQC
3. A patient sample with a known antibody reactivity
4. other, please specify (*manual field*)

21.B. How frequent do you perform run IQC (*choice field*) ***(required)***

1. In each run
2. Not in each run

**SECTION 25: Details on external QC program (EQC) and ISO accreditation for cerebellum**

1. Do you participate for the paraneoplastic screening by IIF in an external QC program? (*choice field*) ***(required)***
   1. Yes
   2. No

22.b. In what external QC program do you participate for the paraneoplastic screening by IIF (*choice field*) ***(required)***

1. UK NEQAS
2. Euroimmun
3. Other
4. Do you have ISO15189 accreditation for IIF screening on cerebellum? (*choice field*) ***(required)***
5. No, but we plan to be accredited within the next 1-2 years
6. No, and we have no plans within the next 2 years
7. Yes

**SECTION 26: PNS: quality assurance strategies: line and/or dot blot**

24. Do you perform a run iQC* for line/dot blots, meaning that an iQC sample is analysed together with patient samples, for the different antigen specificities? **A run iQC implies that a sample with a known specificity is analysed together with patient samples. This differs from internal cut-off QC, which is often also present on line or dot-blot.* ***(required)***

1. Yes (*directed to section 27)*
2. No (*directed to section 28*)

**SECTION 27: Details on run iQC for line/dot blots**

25. For which antibodies do you perform a run iQC? (*choice field, multiple answers possible*) ***(required)***

| **Antibody#** | **Run iQC performed** | **run iQC not performed** |
| --- | --- | --- |
| **Anti-amphiphysin** |  |  |
| **Anti-CV2** |  |  |
| **Anti-PNMA2 (Ma2/Ta)** |  |  |
| **Anti-Ma1** |  |  |
| **Anti-Ri (ANNA-2)** |  |  |
| **Anti-Yo** |  |  |
| **Anti-Hu (PCA-1)** |  |  |
| **Anti-SOX1 (AGNA)** |  |  |
| **Anti-Tr (DNER)** |  |  |

26. How frequent do you apply a run iQC in your line or dot blot analysis? (*choice field*) ***(required)***

- 1. Every run
  2. Every run and at lot change
  3. At lot change only (frequency of lot change)
  4. Not in every run, but at a fixed frequency (independent of lot change)
  5. We do not perform a run iQC
  6. other, please specify (*manual field*)

**SECTION 28: PNS: quality assurance strategies on run iQC for line/dot blots**

27. Do you participate for the line blot in an eQC program? (*choice field*) ***(required)***

1. Yes (*directed to section 29)*
2. No (*directed to section 30)*

**SECTION 29: Details on externe QC programs**

27.B. For which antibodies do you participate in an externa QC program (*choice field*) ***(required)***

| **Antibody** | **Yes** | **No** |
| --- | --- | --- |
| **Anti-amphiphysin** |  |  |
| **Anti-CV2** |  |  |
| **Anti-PNMA2 (Ma2/Ta)** |  |  |
| **Anti-Ma1** |  |  |
| **Anti-Ri (ANNA-2)** |  |  |
| **Anti-Yo** |  |  |
| **Anti-Hu (PCA-1)** |  |  |
| **Anti-SOX1 (AGNA)** |  |  |
| **Anti-Tr (DNER)** |  |  |

**SECTION 30: PNS: quality assurance strategies: line and/or dot blot (part 3)**

28. Do you have the ISO 15189 accreditation for the determination of PNS autoantibodies? ***(required)***

1. No, but we plan to be accredited within the next 1-2 years
2. No, and we have no plans within the next 2 years
3. Yes

**SECTION 31: ISO accreditation details**

28.b. For which PNS autoantibodies are you ISO 15189 accredited? ***(required)***

| **Antibody#** | **Yes** | **No accreditation** |
| --- | --- | --- |
| **Anti-amphiphysin** |  |  |
| **Anti-CV2** |  |  |
| **Anti-PNMA2 (Ma2/Ta)** |  |  |
| **Anti-Ma1** |  |  |
| **Anti-Ri (ANNA-2)** |  |  |
| **Anti-Yo** |  |  |
| **Anti-Hu (PCA-1)** |  |  |
| **Anti-SOX1 (AGNA)** |  |  |
| **Anti-Tr (DNER)** |  |  |

**SECTION 32: ISO accreditation details**

Thank you for your participation!
