# Supplementary material for: Towards harmonization of autoantibody detection in relation to paraneoplastic neurological syndromes (PNS): a European Survey on laboratory practices
Source: publisher site journal article supplement (doi:10.1515/cclm-2025-1030), 2025-10-06
Supplement: Supplementary file 2 [file j_cclm-2025-1030_suppl_003.docx]

**SUPPLEMENTAL TABLE 1**

**Supplemental Table S1.** Overview of studies evaluating the performance of line/dot blots for the identification of PNS antibodies.

| **Reference and type of study** | **Number of samples**  **Type of patients** | **Technique** | **(Comparative) results** | **Clinical associations** | **Conclusion authors** | **Comments/ study limitations** |
| --- | --- | --- | --- | --- | --- | --- |
| ***Ali et al.***  ***Frontiers in Neurology 2025 [15]***  Single-center retrospective study  *Comparison between different test methods (LB and IIF cerebellum) in relation to clinical information* | **Patient samples: N=2081**  Consecutive patient samples analyzed by lab for PNS Ab  Detailed analysis/clinical review of **N= 91 LB+ positive samples** (from 69 patients)   - 35 serum only - 15 CSF only - 16 combination - 3 serial serum   **Healthy donor samples: N= 71 sera** | EUROLINE PNS 12 Ag (Euroimmun)  (serum dilution 1:10; CSF dilution 1:4) + automated reading  Rat cerebellum IIF Inova Diagnostics (dil. 1:1 and 1:50, optional 1:100)  Tested reactivities:  CV2, GAD65; Hu, Ma2/Ta, recoverin, Ri, Tr, Sox-1, Titine, Yo, Zic4, amphiphysine | 4.4% samples (91/2081, 69 patients) positive for PNS Ab*  6/69 patients (9%) multiple reactive  Concordance on LB between serum and CSF  Majority of LB+ samples had no (typical) IIF pattern (90%) | High FP rate on LB:   - PPV%= 9/69 - Spec%=93%   Higher clinical relevance in case of:   - Higher titers (Hu, Tr Amphiphysine) - Confirmed by IIF | LB has more FP than TP results  Use should be limited to those with high clinical suspicion  IIF only is insufficient for screening | *Anti-recoverin and -titine positive samples excluded from the analysis (n= 48)  *weak bands (6-10U) were not considered positive  *samples originating from the same patients were not excluded |
| ***Ruiz-Garcia et al.***  ***Frontiers in Immunology 2020 [16]***  Single-center retrospective study  *Comparison between different test methods (LB and IIF cerebellum) in relation to clinical information* | **Patient serum samples N=2437**  Consecutive patient samples analyzed by lab for PNS Ab  Detailed analysis/clinical review of **N= 493 samples analyzed with both IIF and LB** | EUROLINE PNS 12 Ag  (Euroimmun)  (serum dilution 1:100; CSF dilution 1:4) + automated reading  In-house developed rat cerebellum (dil. 1:500)  Tested reactivities:  CV2, GAD65; Hu, Ma2/Ta, recoverin, Ri, Tr, Sox-1, Titine, Yo, Zic4, amphiphysin | 22% (96/439) positivity for PNS Ab*  18/96 patients (19%) multiple reactive  Concordance LB and IIF:  - 52% (n=50) discordant samples (LB+ and IIF-).  - High concordance (93%) in case high positive result on LB | Concordant results more likely to have:  - PNS: 91% (LB+/IIF+) vs. 8% (LB+/IIF-)  - Cancer: 91% (LB+/IIF+) vs. 30% (LB+/IIF-)  High positive LB results are highly predictive for PNS (PPV 86%)  PPV% of LB+>10U for PNS (irrespective of IIF- concordant with IIF):  Hu: 93%-100%, Sox1:53%-85%; CV2: 50%-80%; Yo1: 29%-100%; Zic: 0%-0%; other: 59%-83% | Patients with suspected PNS should have dual testing  Anti-ZIC4 and -Yo only detected on LB are likely FP  For other Ab, strong intensity on LB correlates with IIF+ and PNS diagnosis  LB results <50U, not confirmed on IIF are les predictive for PNS | *Selection bias: no systematic analysis with both techniques   1. LB+ 2. On physician request 3. Confirmation of results from other lab   *Anti-recoverin, -titine and GAD65 positive samples excluded from the analysis  * isolated neurological symptoms were not considered PNS regardless of the presence of cancer or PNS Ab |
| ***Déchelotte et al., Neurol Neuroimmunol Neuroinflam 2020 [14]***  Single-center retrospective study    *Comparison between different test methods (2 LBs, IIF cerebellum, Western blotting and ell-based assays) in relation to clinical information* | **Patient serum samples: N=5300**  Consecutive patient samples analyzed by lab for PNS Ab  Detailed analysis/clinical review of **N= 314 LB+ positive samples** | PNS+2 blot (LB1)  (Ravo Diagnostica)  + automated reading*  EUROLINE PNS 12 Ag (LB2)  (Euroimmun)  + automated reading*  Confirmatory testing by:   - In-house developed rat cerebellum (dil. 1:100) - WB for anti-CV2 and amphiphysine - CBs for all other PNS Ab   Tested reactivities:  CV2, GAD65; Hu, Ma2/Ta, recoverin, Ri, Tr, Sox-1, Titine, Yo, Zic4, amphiphysine, Ma1 | 6.2% (330/5300) positivity for PNS Ab on one of both LBs (LB1: 7.4%; LB2: 5.1%)  15.3 % (LB1) and 21.5% (LB2%) multiple reactive  Confirmation rate (overall 33%):  - LB1: 36.7% of sera, with varying confirmation rate per PNS Ab (0-88%)  - LB2: 30.1% of sera, with varying confirmation rate per PNS Ab (0-65%); weak positive LB results (8-14U) are never confirmed; relation between signal intensity and final confirmation was variable amongst Ab | Confirmed LB+ results are likely to have:  - PNS: 100%  - Cancer: 86.2%  All non-confirmed LB+ results had no PNS | Less than 1/3 of LB+ results can be confirmed using alternative techniques  Positive LB+ results should be correlated with clinical features, and confirmation are reference centers are needed | *serum dilution not specified but referred to manufacturer’s instructions  *Anti-GAD65, -titine and -recoverine excluded from the analysis |

*Abbreviations: LB= lineblot; WB: Western Blot; antibodies: Ab; IIF; indirect immunofluorescence analysis on cerebellum; PNS: paraneoplastic syndrome; FP: false positive; TP: true positive; PPV: positive predictive value; CSF: cerebrospinal fluid*
