# Supplementary material for: Towards harmonization of autoantibody detection in relation to paraneoplastic neurological syndromes (PNS): a European Survey on laboratory practices
Source: publisher site journal article supplement (doi:10.1515/cclm-2025-1030), 2025-10-06
Supplement: Supplementary file 3 [file j_cclm-2025-1030_suppl_004.docx]

**SUPPLEMENTAL TABLE 2**

**Supplemental Table S2.** Methodological aspects on paraneoplastic syndrome antibody testing – results from Spain.

| **Topic** | **Number of responses** | **Answers** | **%a** | ***p-valueb*** |
| --- | --- | --- | --- | --- |
| **Cerebellum** |  |  |  |  |
| IIF on cerebellum used | 34 | Yes | 85 | *0.557* |
| Type of sample used | 29 | Serum only | 10 | *0.211* |
|  |  | CSF only | 0.0 | *0.466* |
|  |  | Serum and CSF | 90 | *0.165* |
|  |  | Unclear answer | 0 |  |
| Dilution serum | 26 | 1:10 | 89 | ***0.013*** |
|  |  | Other | 11 | ***0.013*** |
| Dilution CSF | 26 | Undiluted | 73 | *0.877* |
|  |  | 1:10 | 7.7 | *0.719* |
|  |  | Other | 19 | *0.758* |
| Endpoint titration | 29 | Always | 20 | *0.673* |
|  |  | Never | 66 | *0.936* |
|  |  | Selected cases | 14 | *0.904* |
| Type of conjugate | 29 | IgG conjugate | 83 | *0.245* |
|  |  | IgG, IgA and IgM conjugate | 17 | *0.334* |
|  |  | Other | 0 | *0.878* |
| **Line blot/dot blot** |  |  |  |  |
| Line/dot blot used | 34 | Yes | 100 | *0.627* |
| **Other methods** |  |  |  |  |
| Other methods than cerebellum or line/dot blot used | 34 | Yes | 18 | *0.866* |

*a Expressed on the total of responses for the particular question, unless stated otherwise*

*b Proportions between Spain and the overall dataset were compared using Chi-Square testing with Yates correction, significant differences are indicated in bold*

*Abbreviations: CSF: cerebrospinal fluid; IIF: indirect immunofluorescence*
