# Supplementary material for: Towards harmonization of autoantibody detection in relation to paraneoplastic neurological syndromes (PNS): a European Survey on laboratory practices
Source: publisher site journal article supplement (doi:10.1515/cclm-2025-1030), 2025-10-06
Supplement: Supplementary file 4 [file j_cclm-2025-1030_suppl_005.docx]

**SUPPLEMENTAL TABLE 3**

**Supplemental Table S3.** Internal and external quality control practices paraneoplastic syndrome antibody testing – results from Spain.

| **Topic** | **Number of responses** | **Answers** | **%a** | ***p-valueb*** |
| --- | --- | --- | --- | --- |
| **Cerebellum** |  |  |  |  |
| **iQC** |  |  |  |  |
| - iQC performed | 28 | Yes | 82 | *0.495* |
| - Frequency | 23 | In each run | 91 | *0.807* |
|  |  | Not in each run | 8.7 | *0.807* |
| - Origin of the iQC sample | 23 | Commercial only | 65 | *0.524* |
|  |  | Patient origin only | 13 | *0.386* |
|  |  | Commercial and patient origin | 22 | *0.973* |
|  |  | Other | 0 | *0.417* |
| **eQC** |  |  |  |  |
| - labs participating in >1 eQC program | 28 | Yes | 29 | *0.257* |
| **ISO-accreditation** | 28 | Yes | 3.6 | ***<0.001*** |
|  |  | No | 68 | *0.005* |
|  |  | No, plan to have it in 1 to 2 years | 29 | *0.368* |
|  |  |  |  |  |
| **Line blot/dot blot** |  |  |  |  |
| **iQC** |  |  |  |  |
| - iQC performed | 34 | Yes | 27 | ***0.044*** |
| - Frequency | 9 | Every run | 33 | *0.790* |
|  |  | Every run and at lot change | 0 | *0.773* |
|  |  | At lot change only | 56 | *0.091* |
|  |  | Not in every run, but at a fixed frequency  Unclear answer | 0  11 | *0.724*  *NA* |
| **ISO-accreditation** |  |  |  |  |
| - ISO15189 accreditation | 34 | Yes | 2.9 | ***<0.001*** |
|  |  | No | 65 | ***0.006*** |
|  |  | No, plan to have it in 1 to 2 years | 32 | *0.256* |

*a Expressed on the total of responses for the particular question, unless stated otherwise*

*bProportions between Spain and the overall dataset were compared using Chi-Square testing with Yates correction, significant differences are indicated in bold*

*Abbreviations: PNS Ab: paraneoplastic syndrome antibodies; iQC: internal quality control; eQC: external quality control; NA: not applicable*
